# Supplementary material
Source: publisher site journal article supplement (https://www.dovepress.com/article/458576)
Supplement: Supplementary file 1 [file get_supplementary_file.php]

| **KSThR** | **ETA** | **C-TIRADS** |
| --- | --- | --- |
| **Type 1:** (No blood supply) There is no blood flow signal in or around the nodule; | **TypeⅠ:** There is no blood flow in or around the nodule; | **①no blood supply type：**No blood flow signal was seen within the nodule; |
| **Type 2:** (Peripheral blood supply) Blood supply is present only around the periphery of the nodule; | **TypeⅡ:** Peripheral blood flow and/or small amounts of intranodal blood flow | **②borderline vascular type：**Only marginal vessels are shown, central vessels are not. |
| **Type 3:**（Mild intra-nodal blood supply) Less than 50% intra-nodal blood supply with or without peripheral blood supply; | **Type Ⅲ:** Marked intranodular blood flow and a small amount of peripheral blood flow | **③Marginal vascular predominant type：**It shows predominantly marginal vessels, with a paucity of central vessels. |
| **Type 4:** (Apparent intranodal blood supply) Intranodal blood supply >50% with or without peripheral blood supply | **④Central vascular predominant type**：It shows mainly central vessels with sparse marginal vessels. |
| **⑤Mixed vessel type：**Marginal and central vessels are similar in richness. |

**Supplemental table 1. Blood flow typing**

KSThR: Korean Society of Thyroid Radiology; ETA: European Thyroid Association; C-TIRADS: Chinese Thyroid Imaging Reporting and Data System;
